# Supplementary material for: Incidence, Risk Factors, and Consequences of Post-Traumatic Stress Disorder Symptoms in Survivors of COVID-19-Related ARDS
Source: MDPI journal article supplement (doi:10.3390/ijerph20085504), 2023-04-13
Supplement: s1 [file s1]

## Supplementary Materials

**Table S1.** The five EQ-5D-5L health dimensions in patients without and with PTSD symptoms.

| EQ-5D-5L DIMENSION         | LEVEL | No PTSD (n 104) | PTSD (n 34) | p-value      |
|----------------------------|-------|-----------------|-------------|--------------|
| ANXIETY AND DEPRESSION (%) | 1     | 75 (72.1)       | 14 (41.2)   | <b>0.001</b> |
|                            | 2     | 19 (18.3)       | 9 (26.5)    |              |
|                            | 3     | 9 (8.7)         | 7 (20.6)    |              |
|                            | 4     | 0 (0)           | 3 (8.8)     |              |
|                            | 5     | 1 (1.0)         | 1 (2.9)     |              |
| MOBILITY (%)               | 1     | 68 (65.4)       | 16 (47.1)   | <b>0.004</b> |
|                            | 2     | 25 (24)         | 5 (14.7)    |              |
|                            | 3     | 7 (6.7)         | 7 (20.6)    |              |
|                            | 4     | 4 (3.8)         | 6 (17.6)    |              |
|                            | 5     | 0 (0)           | 0 (0)       |              |
| PAIN-DISCOMFORT (%)        | 1     | 58 (55.8)       | 19 (55.9)   | 0,188        |
|                            | 2     | 31 (29.8)       | 6 (17.6)    |              |
|                            | 3     | 11 (10.6)       | 5 (14.7)    |              |
|                            | 4     | 4 (3.8)         | 4 (11.8)    |              |
|                            | 5     | 0 (0)           | 0 (0)       |              |
| SELF CARE (%)              | 1     | 87 (83.7)       | 25 (73.5)   | 0,081        |
|                            | 2     | 13 (12.5)       | 4 (11.8)    |              |
|                            | 3     | 3 (2.9)         | 5 (14.7)    |              |
|                            | 4     | 1 (1)           | 0 (0)       |              |
|                            | 5     | 0 (0)           | 0 (0)       |              |
| USUAL ACTIVITIES           | 1     | 74 (71.2)       | 21 (61.8)   | <b>0,041</b> |
|                            | 2     | 19 (18.3)       | 3 (8.8)     |              |
|                            | 3     | 8 (7.7)         | 6 (17.6)    |              |
|                            | 4     | 3 (2.9)         | 4 (11.8)    |              |
|                            | 5     | 0 (0)           | 0 (0)       |              |

Abbreviations: PTSD, post-traumatic stress disorder.

**Table S2.** Comparison of SF-36 score in the eight health domain and in Physical and Mental Component Score. between patients without and with PTSD symptoms.

| SF-36 DOMAIN                               | No PTSD (n 104) | PTSD (n 34)   | P value |
|--------------------------------------------|-----------------|---------------|---------|
| Emotional well-being                       | 70.19 (16.11)   | 59.68 (16.18) | 0.002   |
| Energy - Fatigue                           | 54.77 (17.07)   | 47.50 (15.97) | 0.030   |
| General health                             | 56.34 (20.95)   | 35.15 (25.89) | < 0.001 |
| Pain                                       | 80.09 (25.78)   | 70.15 (30.23) | 0.062   |
| Physical functioning                       | 83.70 (20.36)   | 74.41 (26.79) | 0.034   |
| Role limitations due to physical health    | 60.88 (47.02)   | 48.53 (49.60) | 0.190   |
| Role limitations due to emotional problems | 83.64 (34.56)   | 54.90 (48.47) | < 0.001 |
| Social functioning                         | 80.32 (26.32)   | 61.76 (37.68) | 0.002   |
| PCS (Physical Component Score)             | 44.80 (10.27)   | 40.29 (10.45) | 0.028   |
| MCS (Mental Component Score)               | 48.41 (8.28)    | 40.32 (12.26) | < 0.001 |
